# Supplementary material
Source: Royal Society of Chemistry journal article supplement (doi:10.1039/d6ce00467a)
Supplement: d6ce00467a1.pdf [file d6ce00467a1.pdf]

# **A hydrogen-bonded manganese(II) complex assembled by bipyridyl-organodisulfonate ligands exhibiting ultrahigh superprotonic conductivity**

Tao Xu, Ao-Na Sun, Rui-Han Liu, Meng-Tan Cai, Si-Chen Zhang, and Dong Shao \*

*Hubei Key Laboratory of Processing and Application of Catalytic Materials, Hubei Provincial Engineering Research Center of High Purity Raw Material Processing Technology of Electronic Materials, College of Chemistry and Chemical Engineering, Huanggang Normal University, Huanggang 438000, China.*

Correspondence and requests for materials should be addressed to

Email: shaodong@nju.edu.cn

**Table of Contents**

|                                                                                                                                                           |    |
|-----------------------------------------------------------------------------------------------------------------------------------------------------------|----|
| EXPERIMENTAL SECTION .....                                                                                                                                | 3  |
| <b>Figure S1.</b> The used organic sulfonic acid and bipyridyl ligand in this work.....                                                                   | 6  |
| <b>Figure S2.</b> PXRD profiles of as-synthesized <b>MnHOF-102</b> .....                                                                                  | 6  |
| Table S1. Crystallographic data and structure refinement parameters for MnHOF-102.....                                                                    | 7  |
| Table S2. Selected bond lengths (Å) in MnHOF-102.....                                                                                                     | 8  |
| Table S3. Selected bond angles (°) in MnHOF-102.....                                                                                                      | 8  |
| Table S4. Continuous Shape Measure analysis for Mn <sup>II</sup> centers in MnHOF-102.....                                                                | 9  |
| <b>Figure S3.</b> The asymmetric unit of <b>MnHOF-102</b> at 293 K.....                                                                                   | 10 |
| <b>Figure S4.</b> Portion of packing structure of <b>MnHOF-102</b> .....                                                                                  | 11 |
| <b>Figure S5.</b> Hydrogen-bonded network in <b>MnHOF-102</b> without the indication of C and N atoms along <i>a</i> axis.....                            | 12 |
| Table S5. The possible hydrogen bonds in MnHOF-102 at 293 K calculated by PLATON..                                                                        | 13 |
| Table S6. The possible hydrogen bonds in MnHOF-102 at 333 K calculated by PLATON..                                                                        | 13 |
| Table S7. The possible hydrogen bonds in MnHOF-102 at 373 K calculated by PLATON..                                                                        | 14 |
| Figure S6. Photograph of a single crystal in MnHOF-102 at 373 K.....                                                                                      | 15 |
| Figure S7. The asymmetric unit of MnHOF-102 at 373 K.....                                                                                                 | 15 |
| Table S8. The conductivity of MnHOF-102 extracted from impedance spectra gathered at 40 °C under variable relative humidity.....                          | 16 |
| <b>Table S9.</b> The conductivity of <b>MnHOF-102</b> extracted from impedance spectra gathered at different temperature under 95% relative humidity..... | 16 |
| Table S10. Comparison of some proton-conducting materials driven by coordinated water molecules.....                                                      | 17 |
| Figure 8. Time-dependent proton conductivity of MnHOF-102 at 100 °C and 95% RH.....                                                                       | 18 |
| Figure 9. PXRD spectra before and after impedance measurements for MnHOF-102.....                                                                         | 18 |
| <b>Figure S10.</b> Infrared spectra of <b>MnHOF-102</b> .....                                                                                             | 19 |
| References .....                                                                                                                                          | 19 |

## EXPERIMENTAL SECTION

**Materials and Synthesis.** All reagents were purchased from commercially available sources and used without further purification. The ligands **H2bpds** and **22bpy** were bought from TCI chemicals.  $\text{Mn}(\text{NO}_3)_3 \cdot 6\text{H}_2\text{O}$  was bought from Alfa Aesar.

**Synthesis of  $[\text{Mn}(\text{22bpy})(\text{H}_2\text{O})_4] \cdot [\text{22Hbpy}] \cdot 1.5[\text{bpds}] \cdot 2\text{H}_2\text{O}$  (MnHOF-102).** A mixture was prepared containing  $\text{Mn}(\text{NO}_3)_2 \cdot 6\text{H}_2\text{O}$  (30 mg, 0.01 mmol), **H2bpds** (31.4 mg, 0.1 mmol), **22bpy** (15.6 mg, 0.1 mmol), MeCN (2 mL), and water (6 mL). The resulting mixture was stirred for several minutes, and the mixed solution was filtered using a Shimadzu filter. The mixed solution was placed in a 20 ml glass vial and then left to stand for one week. Yellow crystals suitable for X-ray diffraction analysis were obtained in a considerable yield of ca. 59%. Elemental analysis calcd. (%) for  $\text{C}_{38}\text{H}_{41}\text{MnN}_4\text{O}_{15}\text{S}_3$ : C, 48.30; H, 4.37; N, 5.92. Found: C, 48.16, H, 4.21; N, 6.07. IR (KBr,  $\text{cm}^{-1}$ , Figure S10): 3682-2550 (bs), 2831 (s), 1667 (w), 1602 (vs), 1588 (s), 1528 (w), 1473 (s), 1385 (w), 1315 (w), 1201 (vs), 1284(s), 1130 (s), 1032 (vs), 997 (vs), 824 (s), 723 (s)  $\text{cm}^{-1}$ .

### Physical measurements

Elemental analyses of C, H, and N were performed at an Elementar Vario MICRO analyzer. Powder X-ray diffraction data (PXRD) were recorded on a Bruker D8 Advance diffractometer with Cu  $K\alpha$  X-ray source ( $\lambda = 1.54056 \text{ \AA}$ ) operated at 40 kV and 40 mA. Infrared spectra (IR) data were measured on KBr pellets using a Nexus 870 FT-IR spectrometer in the range of 4000-400  $\text{cm}^{-1}$ . Thermal gravimetric analysis (TGA) was measured in  $\text{Al}_2\text{O}_3$  crucibles using a PerkinElmer Thermal Analysis in the temperature range of 30-700  $^\circ\text{C}$  under an Ar atmosphere.

### X-ray Crystallography

Single crystal X-ray diffraction data were collected on a Bruker D8 QUEST diffractometer with a PHOTON III area detector (Mo-K $\alpha$  radiation,  $\lambda = 0.71073 \text{ \AA}$ , Bruker *Ius* 3.0) at 100 K. The APEX III program was used to determine the unit cell parameters and for data collection. The data were integrated and corrected for Lorentz and polarization effects using SAINT.<sup>S1</sup> Absorption corrections were applied with SADABS.<sup>S2</sup> The structures were solved by direct methods and refined by full-matrix least-squares method on *F*<sup>2</sup> using the SHELXTL<sup>S3</sup> crystallographic software package integrated in Olex 2.<sup>S4</sup> All the non-hydrogen atoms were refined anisotropically. Hydrogen atoms of the organic ligands were refined as riding on the corresponding non-hydrogen atoms. Additional details of the data collections and structural refinement parameters are provided in Table S1. Selected bond lengths and angles were listed in Table S2 and S3. CCDC 2551344-2551346 are the supplementary crystallographic data for this paper. They can be obtained freely from the Cambridge Crystallographic Data Centre via [www.ccdc.cam.ac.uk/data\\_request/cif](http://www.ccdc.cam.ac.uk/data_request/cif).

### **Proton conductivity**

The pellet was prepared by compressing the crystalline powder into a cuboidal shape using a custom-fabricated mold under a pressure of  $1000 \text{ kg cm}^{-2}$  for 3 min. Alternating current (AC) impedance measurements were performed for a pellet attached to an Au paste with a gold conducting wire using an electrochemical workstation (DH7007). The test cells containing the pellets were suspended in a commercial temperature and humidity control chamber (DHTHM-27-0-P-SD). Data were collected in steps of  $10 \text{ }^\circ\text{C}$  in a frequency range of 0.1 Hz to 10 kHz and an AC amplitude of 100 mV, thermally equilibrated for 2 hours at each temperature. Bulk

conductivities were estimated by a semicircle fitting of Nyquist plots. Proton conductivity ( $\sigma$ ) is estimated by the following equation,

$$\sigma = L / A \cdot R \quad (1),$$

where  $L$  and  $A$  are the thickness and area of the pellet and  $R$  is the bulk resistance estimated by the Nyquist plot. Activation energy of proton conduction ( $E_a$ ) is estimated by the following equation,

$$\sigma T = \sigma_0 \exp (E_a / k_B T) \quad (2),$$

where  $\sigma$  is the proton conductivity,  $\sigma_0$  is the preexponential factor,  $k_B$  is the Boltzmann constant, and  $T$  is the temperature.

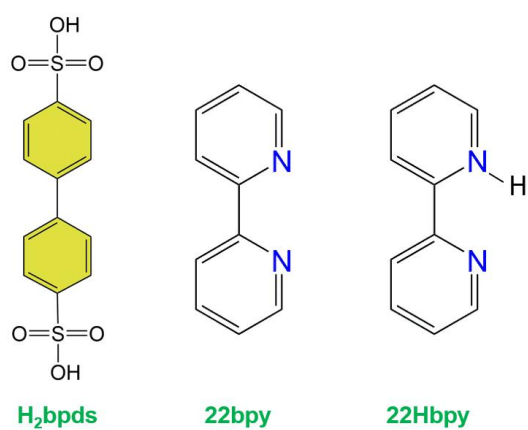

**Figure S1.** The used organic sulfonic acid and bipyridyl ligand in this work.

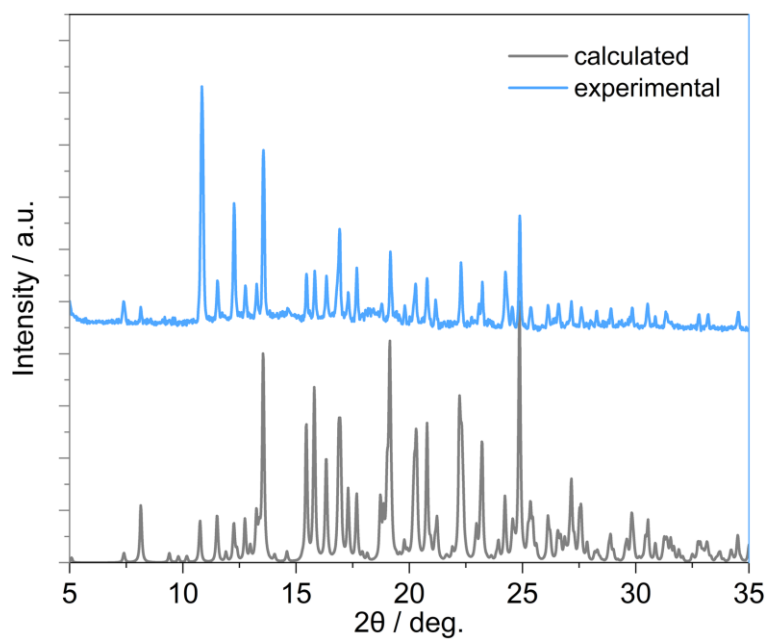

**Figure S2.** PXRD profiles of as-synthesized MnHOF-102.

**Table S1.** Crystallographic data and structure refinement parameters for **MnHOF-102**.

| Temperature / K                                                                                                                                                            | 293                                                                             | 333             | 373             |
|----------------------------------------------------------------------------------------------------------------------------------------------------------------------------|---------------------------------------------------------------------------------|-----------------|-----------------|
| Formula                                                                                                                                                                    | C <sub>38</sub> H <sub>41</sub> MnN <sub>4</sub> O <sub>15</sub> S <sub>3</sub> |                 |                 |
| Weight [g mol <sup>-1</sup> ]                                                                                                                                              | 944.86                                                                          |                 |                 |
| Crystal system                                                                                                                                                             | monoclinic                                                                      |                 |                 |
| Space group                                                                                                                                                                | <i>P2<sub>1</sub>/c</i>                                                         |                 |                 |
| <i>a</i> [Å]                                                                                                                                                               | 17.412(4)                                                                       | 17.391(3)       | 17.360(4)       |
| <i>b</i> [Å]                                                                                                                                                               | 16.438(5)                                                                       | 16.468(3)       | 16.507(4)       |
| <i>c</i> [Å]                                                                                                                                                               | 14.465(4)                                                                       | 14.505(3)       | 14.562(4)       |
| $\alpha$ [°]                                                                                                                                                               | 90                                                                              | 90              | 90              |
| $\beta$ [°]                                                                                                                                                                | 93.558(9)                                                                       | 93.998(5)       | 94.912(8)       |
| $\gamma$ [°]                                                                                                                                                               | 90                                                                              | 90              | 90              |
| <i>V</i> [Å <sup>3</sup> ]                                                                                                                                                 | 4132.3(19)                                                                      | 4144.1(12)      | 4157.9(18)      |
| <i>Z</i>                                                                                                                                                                   | 4                                                                               | 4               | 4               |
| $\rho_{\text{calcd}}$ [g cm <sup>-3</sup> ]                                                                                                                                | 1.517                                                                           | 1.514           | 1.509           |
| $\mu(\text{Mo-K}\alpha)$ [mm <sup>-1</sup> ]                                                                                                                               | 0.546                                                                           | 0.545           | 0.543           |
| <i>F</i> (000)                                                                                                                                                             | 1956.0                                                                          | 1960.0          | 1960.0          |
| <i>R</i> <sub>int</sub>                                                                                                                                                    | 0.0858                                                                          | 0.1186          | 0.1238          |
| <i>R</i> <sub>1</sub> <sup>a</sup> / <i>wR</i> <sub>2</sub> <sup>b</sup> ( <i>I</i> > 2σ( <i>I</i> ))                                                                      | 0.0478 / 0.1205                                                                 | 0.0608 / 0.1522 | 0.0948 / 0.2303 |
| <i>R</i> <sub>1</sub> / <i>wR</i> <sub>2</sub> (all data)                                                                                                                  | 0.0718 / 0.1382                                                                 | 0.0956 / 0.1740 | 0.1161 / 0.2444 |
| GOF on <i>F</i> <sup>2</sup>                                                                                                                                               | 1.034                                                                           | 1.030           | 1.063           |
| Max/min [e Å <sup>-3</sup> ]                                                                                                                                               | 0.47 / -0.38                                                                    | 0.32 / -0.39    | 0.48 / -0.36    |
| <sup>a</sup> <i>R</i> <sub>1</sub> = $\sum   F_o  -  F_c   / \sum  F_o $ . <sup>b</sup> <i>wR</i> <sub>2</sub> = $\{\sum [w(F_o^2 - F_c^2)^2] / \sum [w(F_o^2)^2]\}^{1/2}$ |                                                                                 |                 |                 |

**Table S2.** Selected bond lengths (Å) in **MnHOF-102**.

| <i>T</i> / K | 293      | 333      | 373      |
|--------------|----------|----------|----------|
| Mn1-O1       | 2.241(2) | 2.239(3) | 2.232(6) |
| Mn1-O2       | 2.162(2) | 2.164(4) | 2.154(6) |
| Mn1-O3       | 2.135(2) | 2.139(4) | 2.143(7) |
| Mn1-O4       | 2.150(2) | 2.146(4) | 2.183(7) |
| Mn1-N1       | 2.247(2) | 2.248(3) | 2.248(8) |
| Mn1-N2       | 2.234(2) | 2.245(4) | 2.232(8) |

**Table S3.** Selected bond angles (°) in **MnHOF-102**.

| <i>T</i> / K | 293        | 333        | 373      |
|--------------|------------|------------|----------|
| O1-Mn1-N1    | 94.86(10)  | 94.60(14)  | 95.2(2)  |
| O4-Mn1-O1    | 90.07(11)  | 90.04(14)  | 84.5(3)  |
| O4-Mn1-O2    | 97.93(14)  | 98.30(19)  | 97.8(3)  |
| O4-Mn1-N1    | 167.83(13) | 167.97(18) | 167.1(3) |
| O4-Mn1-N2    | 95.75(13)  | 95.43(17)  | 94.9(3)  |
| O2-Mn1-O1    | 84.26(12)  | 84.42(15)  | 89.4(2)  |
| O2-Mn1-N1    | 93.63(12)  | 93.20(17)  | 94.4(3)  |
| O2-Mn1-N2    | 165.53(13) | 165.60(17) | 166.8(3) |
| O3-Mn1-O1    | 176.45(10) | 176.13(14) | 172.8(3) |
| O3-Mn1-O4    | 87.21(13)  | 87.12(18)  | 89.2(3)  |
| O3-Mn1-O2    | 93.84(15)  | 93.4(2)    | 88.1(3)  |
| O3-Mn1-N1    | 88.25(12)  | 88.70(16)  | 88.8(3)  |
| O3-Mn1-N2    | 91.49(13)  | 91.60(18)  | 95.5(3)  |

**Table S4.** Continuous Shape Measure analysis for Mn<sup>II</sup> centers in **MnHOF-102**.

| Metal center     | Parameters | CShM value   |              |              | Coordination geometry |
|------------------|------------|--------------|--------------|--------------|-----------------------|
|                  |            | 293 K        | 333 K        | 373 K        |                       |
| Mn <sup>II</sup> | HP-6       | 31.561       | 31.654       | 31.730       | OC-6                  |
|                  | PPY-6      | 25.250       | 25.456       | 24.492       |                       |
|                  | OC-6       | <b>0.921</b> | <b>0.900</b> | <b>1.027</b> |                       |
|                  | TPR-6      | 12.538       | 12.508       | 11.855       |                       |
|                  | JPPY-6     | 29.146       | 29.358       | 28.257       |                       |

\*CShM<sup>SS</sup> parameters for six-coordinated complexes:

HP-6 - the parameter related to the hexagon ( $D_{6h}$ )

PPY-6 - the parameter related to the pentagonal pyramid ( $C_{5v}$ )

OC-6 - the parameter related to the octahedron ( $O_h$ )

TPR-6 - the parameter related to the trigonal prism ( $D_{3h}$ )

JPPY-6 - the parameter related to the Johnson pentagonal pyramid ( $C_{5v}$ )

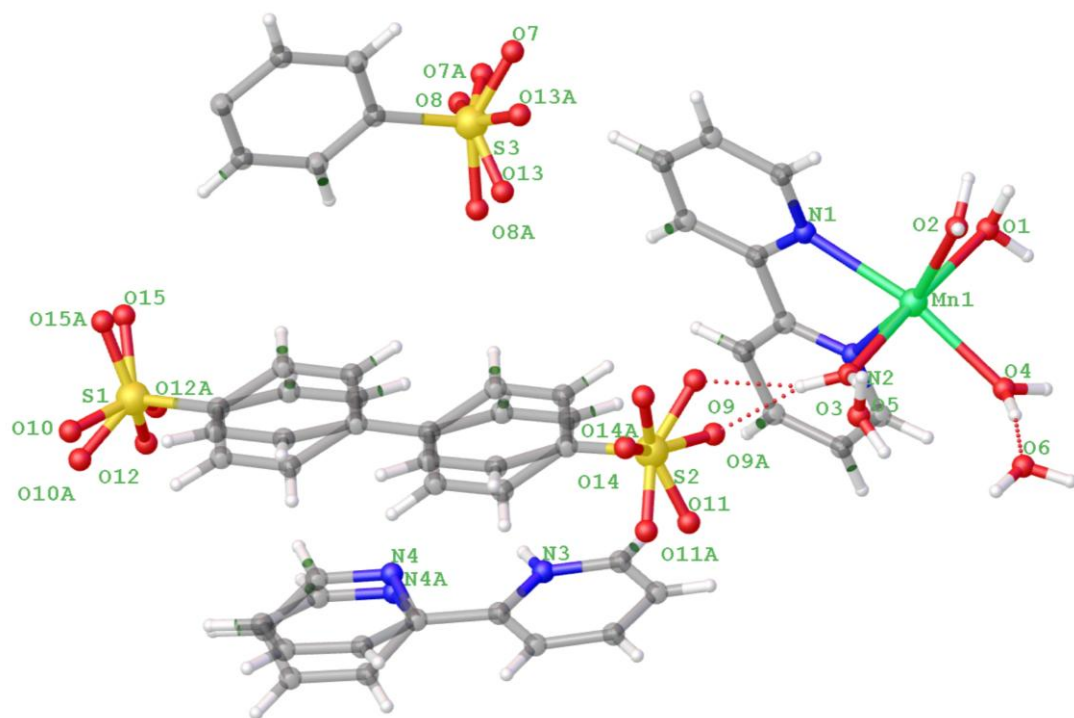

**Figure S3.** The asymmetric unit of **MnHOF-102** at 293 K.

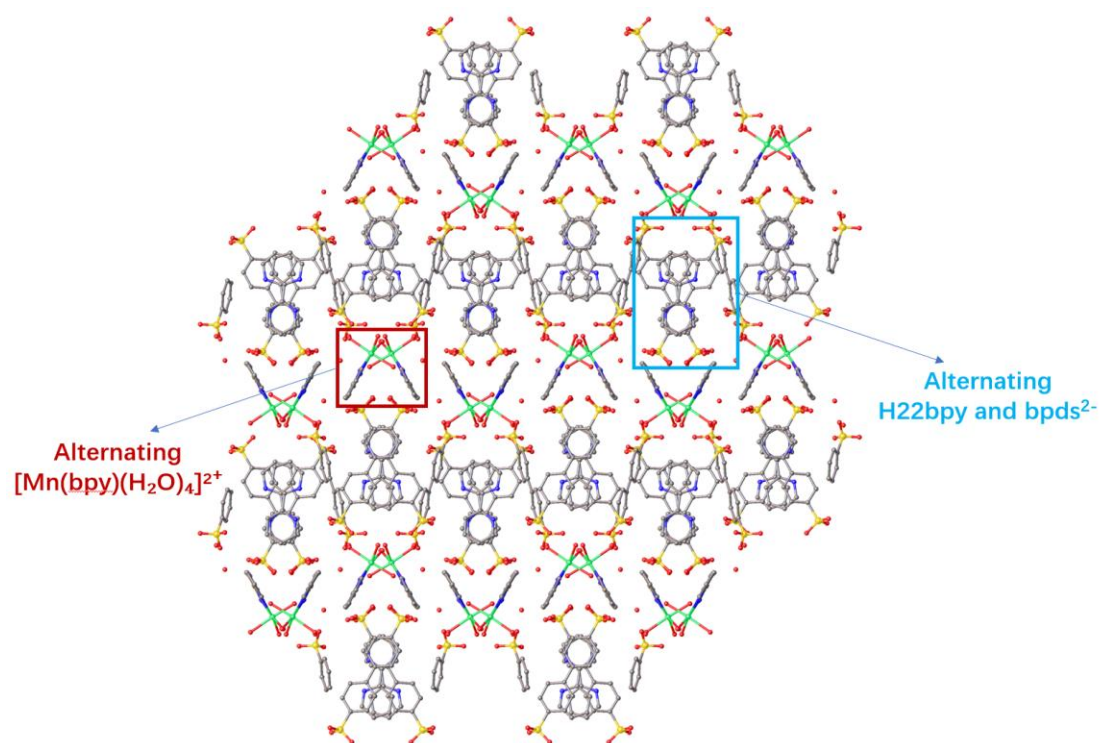

**Figure S4.** Portion of packing structure of **MnHOF-102**.

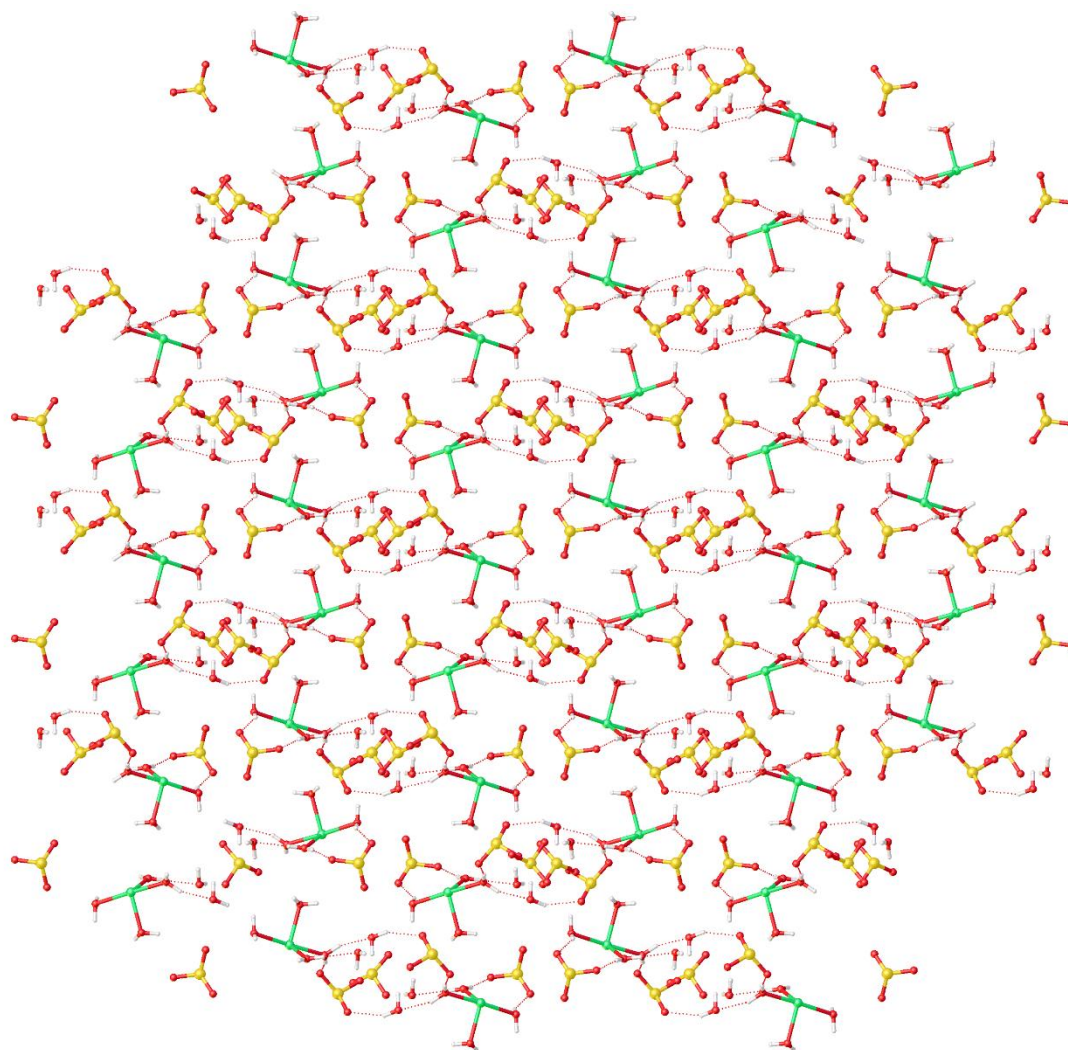

**Figure S5.** Hydrogen-bonded network in **MnHOF-102** without the indication of C and N atoms along  $a$  axis.

**Table S5.** The possible hydrogen bonds in **MnHOF-102** at 293 K calculated by PLATON.

| D-H...A          | d(D- H) | d(H...A) | d(D...A) | < (DHA) |
|------------------|---------|----------|----------|---------|
| O1-H(1A) ..O(13) | 0.85    | 1.93     | 2.7175   | 152     |
| O1-H(1B) ..O(10) | 0.85    | 2.56     | 3.3206   | 149     |
| O1-H(1B) ..O(12) | 0.85    | 2.29     | 2.9943   | 140     |
| O2-H(2A) ..O(10) | 0.86    | 2.43     | 2.737    | 102     |
| O2-H(2B) ..O(8)  | 0.86    | 2.47     | 2.9043   | 112     |
| N3-H(3) ..N(4)   | 0.78    | 2.34     | 2.6662   | 106     |
| N3-H(3) ..O(15)  | 0.78    | 2.51     | 3.1165   | 136     |
| O3-H(3A) ..O(5)  | 0.85    | 1.77     | 2.5988   | 164     |
| O3-H(3B) ..O(9)  | 0.85    | 1.87     | 2.6927   | 164     |
| O4-H(4A) ..O(6)  | 0.85    | 1.84     | 2.6836   | 170     |
| O4-H(4B) ..O(8)  | 0.85    | 1.92     | 2.7522   | 168     |
| O5-H(5B) ..O(11) | 0.85    | 1.96     | 2.7149   | 147     |
| O6-H(6B) ..O(10) | 0.85    | 2.37     | 2.9518   | 126     |
| O6-H(6B) ..O(15) | 0.85    | 2.43     | 3.2817   | 175     |

**Table S6.** The possible hydrogen bonds in **MnHOF-102** at 333 K calculated by PLATON.

| D-H...A          | d(D- H) | d(H...A) | d(D...A) | < (DHA) |
|------------------|---------|----------|----------|---------|
| O1-H(1A) ..O(7)  | 0.86    | 1.98     | 2.7353   | 146     |
| O1-H(1B) ..O(10) | 0.86    | 2.57     | 3.3493   | 152     |
| O1-H(1B) ..O(12) | 0.86    | 2.26     | 2.9885   | 143     |
| O2-H(2A) ..O(10) | 0.86    | 2.34     | 2.728    | 108     |
| O2-H(2B) ..O(9)  | 0.86    | 2.52     | 2.9232   | 110     |
| N3-H(3A) ..O(5)  | 0.85    | 1.77     | 2.5714   | 156     |
| N3-H(3B) ..O(8)  | 0.85    | 1.84     | 2.6812   | 168     |
| O3-H(3C) ..N(4)  | 0.86    | 2.28     | 2.663    | 107     |

|                  |      |      |        |     |
|------------------|------|------|--------|-----|
| O3-H(3C) ..O(15) | 0.86 | 2.46 | 3.0979 | 131 |
| O4-H(4A) ..O(6)  | 0.85 | 1.91 | 2.7057 | 155 |
| O4-H(4B) ..O(9)  | 0.85 | 1.92 | 2.7585 | 171 |
| O5-H(5A) ..O(3)  | 0.85 | 2.14 | 2.5714 | 111 |
| O5-H(5B) ..O(11) | 0.85 | 2.02 | 2.7069 | 137 |
| O6-H(6A) ..O(4)  | 0.85 | 1.98 | 2.7057 | 142 |

**Table S7.** The possible hydrogen bonds in **MnHOF-102** at 373 K calculated by PLATON.

| D-H...A          | d(D- H) | d(H...A) | d(D...A) | < (DHA) |
|------------------|---------|----------|----------|---------|
| O1-H(1A) ..O(8)  | 0.85    | 1.93     | 2.7756   | 175     |
| O1-H(1B) ..O(12) | 0.85    | 2.11     | 2.9503   | 169     |
| O2-H(2A) ..O(6)  | 0.85    | 1.92     | 2.7034   | 153     |
| O2-H(2B) ..O(10) | 0.85    | 1.96     | 2.775    | 161     |
| O3-H(3A) ..O(9)  | 0.97    | 1.69     | 2.6264   | 159     |
| N3-H(3C) ..N(4)  | 0.86    | 2.28     | 2.6638   | 107     |
| N3-H(3C) ..O(7)  | 0.86    | 2.36     | 3.02     | 134     |
| O4-H(4A) ..O(15) | 0.86    | 1.89     | 2.733    | 167     |
| O4-H(4B) ..O(10) | 0.86    | 2.41     | 2.9103   | 117     |
| O5-H(5A) ..O(13) | 0.85    | 2.38     | 2.7218   | 104     |
| O5-H(5A) ..O(6)  | 0.85    | 2.48     | 3.0908   | 130     |
| O5-H(5B) ..O(3)  | 0.85    | 1.66     | 2.4056   | 144     |
| O6-H(6A) ..O(2)  | 0.85    | 2.35     | 2.7034   | 106     |
| O6-H(6B) ..O(15) | 0.85    | 2.16     | 2.9218   | 149     |

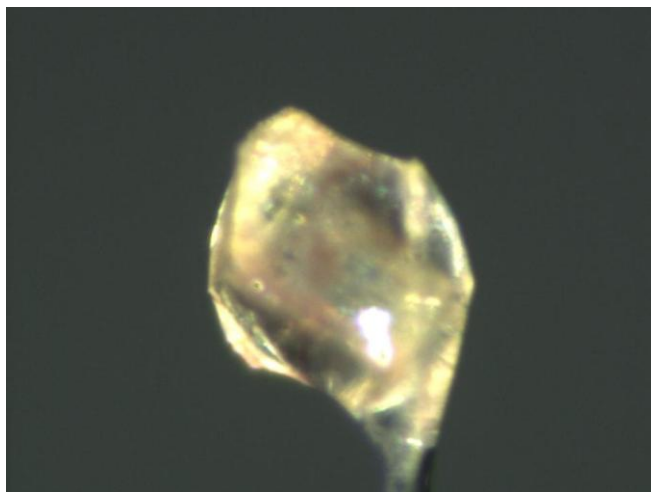

**Figure S6.** Photograph of a single crystal in **MnHOF-102** at 373 K.

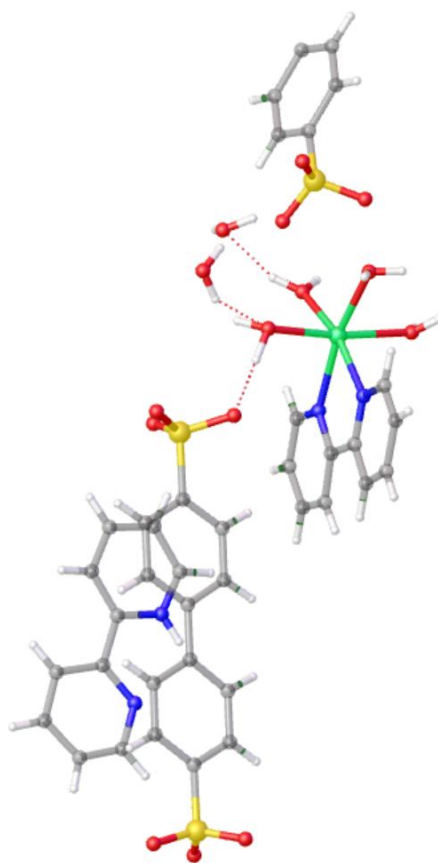

**Figure S7.** The asymmetric unit of **MnHOF-102** at 373 K.

**Table S8.** The conductivity of **MnHOF-102** extracted from impedance spectra gathered at 40 °C under variable relative humidity.

| RH % | $\sigma / \text{S cm}^{-1}$ |
|------|-----------------------------|
| 45   | $7.11 \times 10^{-7}$       |
| 55   | $1.73 \times 10^{-7}$       |
| 65   | $7.73 \times 10^{-6}$       |
| 75   | $1.26 \times 10^{-6}$       |
| 85   | $2.61 \times 10^{-5}$       |
| 95   | $3.12 \times 10^{-4}$       |

**Table S9.** The conductivity of **MnHOF-102** extracted from impedance spectra gathered at different temperature under 95% relative humidity.

| T / °C | $\sigma / \text{S cm}^{-1}$ |
|--------|-----------------------------|
| 30     | $6.03 \times 10^{-5}$       |
| 40     | $2.02 \times 10^{-4}$       |
| 50     | $2.41 \times 10^{-4}$       |
| 60     | $3.45 \times 10^{-4}$       |
| 70     | $4.42 \times 10^{-4}$       |
| 80     | $5.52 \times 10^{-3}$       |
| 90     | $1.08 \times 10^{-2}$       |
| 100    | $2.11 \times 10^{-2}$       |

**Table S10.** Comparison of some proton-conducting materials driven by coordinated water molecules.

| Compounds                                                                                                                                                     | Conductivity / S cm <sup>-1</sup>       | $E_a$ / eV  | Working conditions | Num. of coordinated water | Refs.            |
|---------------------------------------------------------------------------------------------------------------------------------------------------------------|-----------------------------------------|-------------|--------------------|---------------------------|------------------|
| {[Co(bpy)(H <sub>2</sub> O) <sub>2</sub> (NO <sub>3</sub> ) <sub>2</sub> ]·H <sub>2</sub> O} <sub>n</sub>                                                     | $2.99 \times 10^{-1}$                   | 0.17        | 85 °C; 95 %        | 2                         | S6               |
| {[Co(bpy)(H <sub>2</sub> O) <sub>4</sub> ](Hbtc)·(H <sub>2</sub> O) <sub>1.5</sub> } <sub>n</sub>                                                             | $1.49 \times 10^{-1}$                   | 0.4         | 80 °C; 98 %        | 4                         | S7               |
| {[Co(bpy)(H <sub>2</sub> O) <sub>4</sub> ](btc) <sub>0.5</sub> ·H <sub>2</sub> O} <sub>n</sub>                                                                | $4.15 \times 10^{-2}$                   | 0.29        | 80 °C; 98 %        | 2                         | S7               |
| <b>[Mn(22bpy)(H<sub>2</sub>O)<sub>4</sub>]·[22Hbpy]·1.5bpds·2H<sub>2</sub>O</b>                                                                               | <b><math>2.11 \times 10^{-2}</math></b> | <b>0.38</b> | <b>100 °C; 95%</b> | <b>4</b>                  | <b>This work</b> |
| {[Co(bpy)(H <sub>2</sub> O) <sub>4</sub> ](fdc)·(H <sub>2</sub> O) <sub>1.5</sub> } <sub>n</sub>                                                              | $4.85 \times 10^{-3}$                   | 0.4         | 80 °C; 98 %        | 5                         | S7               |
| {[Mg <sub>2</sub> (OBA) <sub>2</sub> (H <sub>2</sub> O) <sub>6</sub> ]·2H <sub>2</sub> O} <sub>n</sub>                                                        | $1.27 \times 10^{-2}$                   | 0.13        | 80 °C; 95 %        | 6                         | S8               |
| {[Tb <sub>4</sub> (TTHA) <sub>2</sub> (H <sub>2</sub> O) <sub>4</sub> ]·7H <sub>2</sub> O} <sub>n</sub>                                                       | $2.57 \times 10^{-2}$                   | 0.68        | 60 °C; 98 %        | 4                         | S9               |
| {[Co(bpy) <sub>3</sub> (H <sub>2</sub> O) <sub>2</sub> ](bpy)·2NO <sub>3</sub> ·(5.4H <sub>2</sub> O)} <sub>n</sub>                                           | $1.85 \times 10^{-2}$                   | 0.38        | 80 °C; 98 %        | 2                         | S10              |
| [Fe(C <sub>6</sub> N <sub>6</sub> O <sub>2</sub> )(H <sub>2</sub> O) <sub>4</sub> ]·5H <sub>2</sub> O                                                         | $2.1 \times 10^{-3}$                    | 0.68        | 22 °C; 95 %        | 4                         | S11              |
| [Co(H <sub>2</sub> O) <sub>6</sub> ][H <sub>2</sub> tcba]                                                                                                     | $1.6 \times 10^{-3}$                    | 0.31        | 100 °C; 97 %       | 6                         | S12              |
| Fe(ox)·2H <sub>2</sub> O                                                                                                                                      | $1.3 \times 10^{-3}$                    | 0.37        | 25 °C; 98 %        | 2                         | S13              |
| [Co <sub>2</sub> (dobdc)(H <sub>2</sub> O) <sub>2</sub> ]·6H <sub>2</sub> O                                                                                   | $6.1 \times 10^{-4}$                    | 0.15        | 90 °C; 95 %        | 2                         | S14              |
| {[Cu <sub>4</sub> (μ <sub>3</sub> -OH) <sub>4</sub> (4,4'-bpy) <sub>2</sub> (2,6-NDS)(H <sub>2</sub> O) <sub>7</sub> ]·2,6NDS·6H <sub>2</sub> O} <sub>n</sub> | $5.2 \times 10^{-4}$                    | 0.78        | 80 °C; 98 %        |                           | S15              |
| [Co(QLC) <sub>2</sub> ·(H <sub>2</sub> O) <sub>2</sub> ]                                                                                                      | $1.4 \times 10^{-4}$                    | 0.39        | 70 °C; 97 %        | 2                         | S16              |
| [Mg <sub>2</sub> (dstp)(H <sub>2</sub> O) <sub>4</sub> ]·3H <sub>2</sub> O·0.5DEF                                                                             | $1.3 \times 10^{-4}$                    | 0.19        | 80 °C; 50 %        | 4                         | S17              |
| [Ca <sub>2</sub> (BTC)(DMA)(H <sub>2</sub> O)]                                                                                                                | $2.0 \times 10^{-5}$                    | 0.40        | 25 °C; 98 %        | 1                         | S18              |
| [Cu <sub>3</sub> (BTC) <sub>2</sub> (H <sub>2</sub> O) <sub>3</sub> ] <sub>n</sub>                                                                            | $1.5 \times 10^{-5}$                    | /           | 25 °C              | 3                         | S19              |

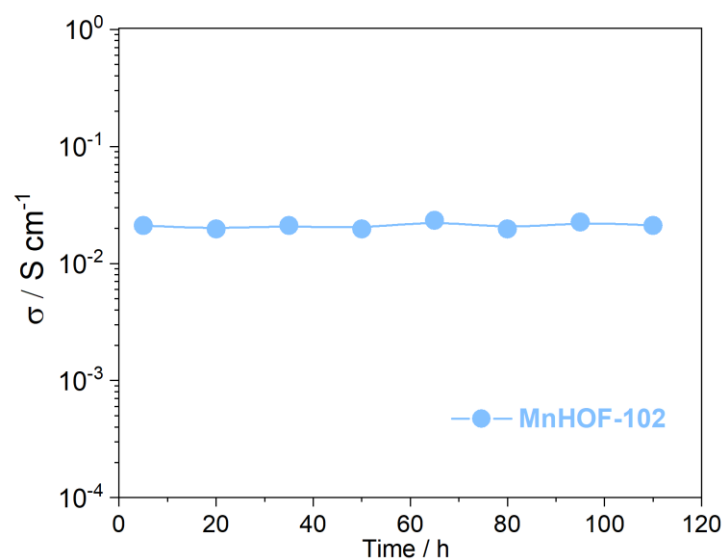

**Figure 8.** Time-dependent proton conductivity of **MnHOF-102** at 100 °C and 95% RH.

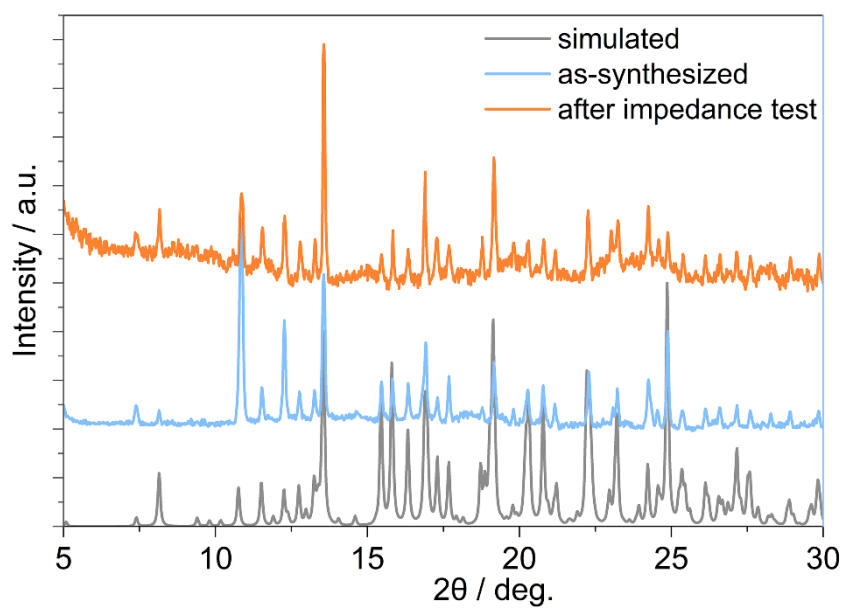

**Figure 9.** PXRD spectra before and after impedance measurements for **MnHOF-102**.

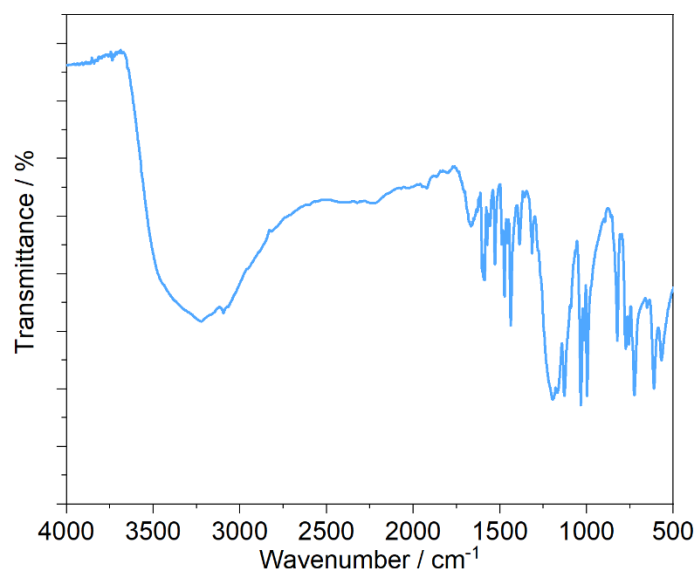

**Figure S10.** Infrared spectra of **MnHOF-102**.

## References

- 1) SAINT Software Users Guide, version 7.0; Bruker Analytical X-Ray Systems: Madison, WI, 1999.
- 2) G. M. Sheldrick, SADABS, version 2.03; Bruker Analytical X-Ray Systems, Madison, WI, 2000.
- 3) G. M. Sheldrick, SHELXTL, Version 6.14, Bruker AXS, Inc.; Madison, WI 2000-2003.
- 4) Dolomanov, O. V.; Bourhis, L. J.; Gildea, R. J.; Howard, J. A. K.; Puschmann, H. OLEX2: A Complete Structure Solution, Refinement and Analysis Program. *J. Appl. Crystallogr.*, 2009, 42, 339–341.
- 5) M. Llunell, D. Casanova, J. Cirera, P. Alemany and S. Alvarez, SHAPE, Version 2.1. Universitat de Barcelona, 2013.
- 6) S. C. Pal, D. Mukherjee, Y. Oruganti, B. G. Lee, D.-W. Lim, B. Pramanik, A. K. Manna and M. C. Das, *J. Am. Chem. Soc.*, 2024, 146, 14546–14557.
- 7) S. M. Elahi, S. Chand, W.-H. Deng, A. Pal and M. C. Das, *Angew. Chem. Int. Ed.*, 2018, 57, 6662–6666.
- 8) S. Chand, S. C. Pal, D.-W. Lim, K. Otsubo, A. Pal, H. Kitagawa and M. C. Das, *ACS Mater. Lett.*, 2020, 2, 1343–1350.

- 9) L. Feng, H.-S. Wang, H.-L. Xu, W.-T. Huang, T.-Y. Zeng, Q.-R. Cheng, Z.-Q. Pan and H. Zhou, *Chem. Commun.*, 2019, 55, 1762–1765.
- 10) S. C. Pal, S. Chand, A. G. Kumar, P. G. M. Mileo, I. Silverwood, G. Maurin, S. Banerjee, S. M. Elahi and M. C. Das, *J. Mater. Chem. A*, 2020, 8, 7847–7853.
- 11) H. Bunzen, A. Javed, D. Klawinski, A. Lamp, M. Grzywa, A. Kalytta-Mewes, M. Tiemann, H.-A. K. von Nidda, T. Wagner and D. Volkmer, *ACS Appl. Nano Mater.*, 2019, 2, 291–298.
- 12) D. Shao, Y. Zhou, X. Yang, J. Yue, S. Ming, X.-Q. Wei and Z. Tian, *Dalton Trans.*, 2022, 51, 18514–18519.
- 13) T. Yamada, M. Sadakiyo and H. Kitagawa, *J. Am. Chem. Soc.*, 2009, 131, 3144–3145.
- 14) S. Hwang, E. J. Lee, D. Song and N. C. Jeong, *ACS Appl. Mater. Interfaces*, 2018, 10, 35354–35360.
- 15) R. Sahoo, S. Luo, N. K. Pendyala, S. Chand, Z.-H. Fu and M. C. Das, *Mater. Chem. Front.*, 2023, 7, 3373–3381.
- 16) X.-M. Bu, S.-Y. Yang, Q. Zhang, L.-Z. Han, E.-S. Xiang, X.-C. Huang, L. Shi and D. Shao, *J. Mol. Struct.*, 2023, 1286, 135544.
- 17) J. H. Lee, H. Kim, M. Kang, D. S. Choi and C. S. Hong, *Bull. Korean Chem. Soc.*, 2021, 42, 322–325.
- 18) A. Mallick, T. Kundu and R. Banerjee, *Chem. Commun.*, 2012, 48, 8829–8831.
- 19) N. C. Jeong, B. Samanta, C. Y. Lee, O. K. Farha and J. T. Hupp, *J. Am. Chem. Soc.*, 2012, 134, 51–54.
